# Supplementary material for: Droplet microfluidic method for measurement of ultralow interfacial tension in ternary fluid systems
Source: Royal Society of Chemistry journal article supplement (doi:10.1039/d4lc01047g), 2025-01-01
Supplement: d4lc01047g1.pdf [file d4lc01047g1.pdf]

## Supplemental Information

### Droplet microfluidic method for measurement of ultralow interfacial tension in ternary fluid systems

Thai Dinh, Robert Casal, and Thomas Cubaud

#### (a) Supporting data

The data supporting the article are listed in Table I for water-isopropanol mixtures and in Table II for ethanol-isopropanol mixtures. The uncertainty in interfacial tension  $\gamma$  at  $\Phi_S \neq 0$  is estimated at about 20% of the measured value.

Table I: Data for water-IPA mixtures, including solvent concentration  $\Phi_S$ , prefactor ratio  $k/k_0$ , and interfacial tension  $\gamma$ .

| $\Phi_S$ | $k/k_0$ | $\gamma$ (mN/m) |
|----------|---------|-----------------|
| 0.00     | 1.000   | 42.70           |
| 0.10     | 0.790   | 21.05           |
| 0.20     | 0.716   | 15.67           |
| 0.30     | 0.672   | 12.96           |
| 0.40     | 0.652   | 11.84           |
| 0.50     | 0.637   | 11.04           |
| 0.60     | 0.635   | 10.93           |
| 0.70     | 0.601   | 9.27            |
| 0.80     | 0.569   | 7.87            |
| 0.90     | 0.514   | 5.80            |
| 0.95     | 0.396   | 2.65            |
| 0.99     | 0.223   | 0.47            |

Table II: Data for Ethanol-IPA mixtures, including solvent concentration  $\Phi_S$ , prefactor ratio  $k/k_0$ , and interfacial tension  $\gamma$ .

| $\Phi_S$ | $k/k_0$ | $\gamma$ (mN/m) |
|----------|---------|-----------------|
| 0.00     | 1.000   | 0.750           |
| 0.10     | 0.864   | 0.483           |
| 0.20     | 0.688   | 0.244           |
| 0.30     | 0.641   | 0.197           |
| 0.40     | 0.571   | 0.140           |
| 0.50     | 0.522   | 0.107           |
| 0.60     | 0.503   | 0.095           |
| 0.70     | 0.419   | 0.055           |
| 0.80     | 0.197   | 0.006           |
| 0.90     | 0.139   | 0.002           |

#### (b) Uncertainty analysis

The measurement method of interfacial tension  $\gamma_i$  at solvent concentration  $\Phi_S = i$  is based on the relationship  $\gamma_i = \gamma_0(k_i/k_0)^3$ , where  $\gamma_0$  is the reference interfacial tension at  $\Phi_S = 0$  and constants  $k_0$  and  $k_i$  are prefactors in the relationship for the droplet spacing  $L_0/h = k_0(\varphi Q_T^{1/3})^{-1}$  and  $L_i/h =$

$k_i(\varphi Q_1^{1/3})^{-1}$  respectively. The Root-Sum-Square method is used to estimate the relative uncertainty  $\Delta\gamma_i/\gamma_i \approx 20\%$  according to

$$\frac{\Delta\gamma_i}{\gamma_i} = \left[ \left( \frac{\Delta\gamma_0}{\gamma_0} \right)^2 + \left( 3 \frac{\Delta k_i}{k_i} \right)^2 + \left( 3 \frac{\Delta k_0}{k_0} \right)^2 \right]^{1/2}$$

The uncertainty of the Du Nouy ring method is estimated at  $\Delta\gamma_0/\gamma_0 = 5\%$  of the measured value and the relative error in the determination of prefactor  $k_0$  and  $k_i$  corresponds to  $\Delta k_0/k_0 = \Delta k_i/k_i = 5\%$ , which yields  $\Delta\gamma_i/\gamma_i = 21.8\% \approx 20\%$

### (c) Experimental validation

The experimental validation of the proposed microfluidic technique is conducted with immiscible fluid pairs made of a mixture of DI water and ethanol in a continuous phase of 100-cSt silicone oil. First, the surface tension of the mixture with air is measured using the Du Nouy ring method and compared with the literature [G. Vazquez, E. Alvarez, J. M. Navaza, *Journal of chemical and engineering data*, 1995, 40(3), 611-644] to validate the Du Nouy ring method in Fig. S1(a). Second, microfluidic experiments are conducted with the water-ethanol mixtures and 100-cSt silicone oil at low flow rate ratio  $\varphi = 0.05$  and data are reported in Fig. S1(b).

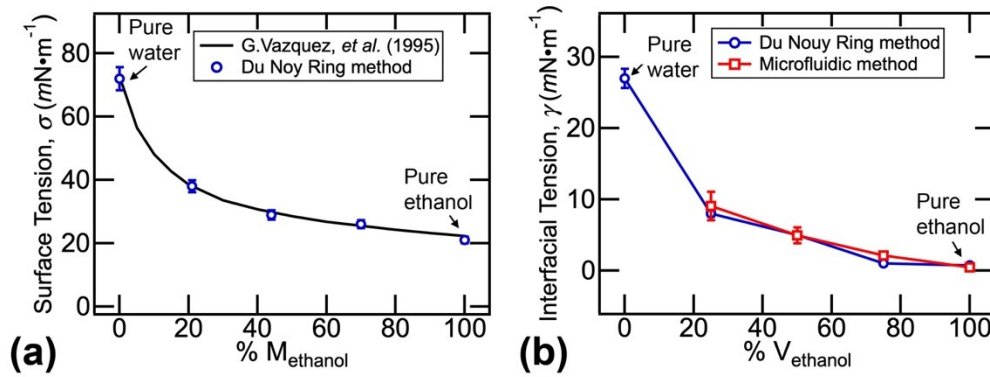

**Fig. S1** Validation of interfacial tension measurements with immiscible fluids. (a) Measurements of surface tension  $\sigma$  between a mixture of DI water and ethanol with air at room temperature as a function of the percent mass of ethanol in the mixture. Symbols: Du Nouy ring method, relative error  $\Delta\sigma/\sigma = 5\%$  (○). Solid line: published data. (b) Measurement of interfacial tension  $\gamma$  between a mixture of DI water and ethanol with 100-cSt silicone oil at room temperature as a function of the percent volume of ethanol in the mixture. Symbols: Du Nouy ring method, relative error  $\Delta\gamma/\gamma = 5\%$  (○) and presented microfluidic method, relative error  $\Delta\gamma/\gamma = 21.8\%$  (□).
